# Supplementary material for: In Vitro Analysis of Cytotoxic Activities of Monotheca buxifolia Targeting WNT/β-Catenin Genes in Breast Cancer Cells
Source: MDPI journal article supplement (doi:10.3390/plants12051147), 2023-03-02
Supplement: s1 [file s1]

## Article

# In Vitro Analysis of Cytotoxic Activities of *Monotheca buxifolia* Targeting *WNT/β-Catenin* Genes in Breast Cancer Cells

Ambreen Sher <sup>1</sup>, Sobia Tabassum <sup>1,\*</sup>, Heather Mann Wallace <sup>2</sup>, Asifullah Khan <sup>3</sup>, Asad Mustafa Karim <sup>4</sup>, Sarah Gul <sup>1</sup> and Se Chan Kang <sup>4,\*</sup>

<sup>1</sup> Department of Biological Sciences, Faculty of Basic and Applied Sciences, International Islamic University, Islamabad 44000, Pakistan

<sup>2</sup> Institute of Medical Sciences, University of Aberdeen, Aberdeen AB24 3FX, UK

<sup>3</sup> Department of Computer and Information Sciences, Pakistan Institute of Engineering and Applied Sciences (PIEAS), Islamabad 44000, Pakistan

<sup>4</sup> Graduate School of Biotechnology, Department of Oriental Medicine Biotechnology, Kyung Hee University, Yongin 17104, Republic of Korea

\* Correspondence: sobia.tabassum@iiu.edu.pk (S.T.); sckang@khu.ac.kr (S.C.K.)

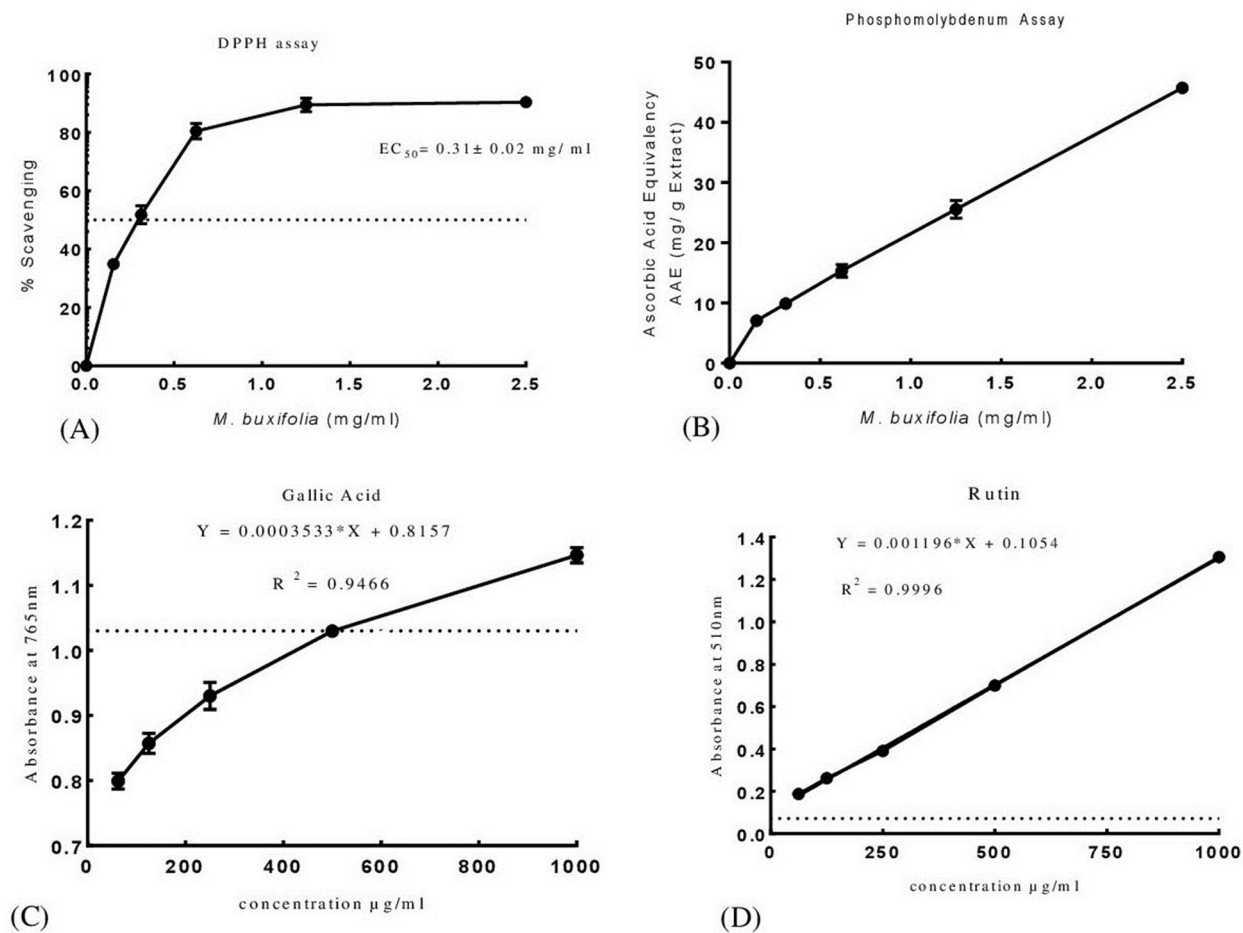

**Figure S1.** DPPH radical scavenging assay was performed using methanolic extract of *M. buxifolia* at varying concentrations (A); Phosphomolybdate assay was performed using different concentrations of methanolic extract of *M. buxifolia* (B); Total phenolic contents were evaluated using Gallic acid as a standard (C); and Flavonoid contents were evaluated using Rutin as a standard (D). Each value represents a mean ± SD.

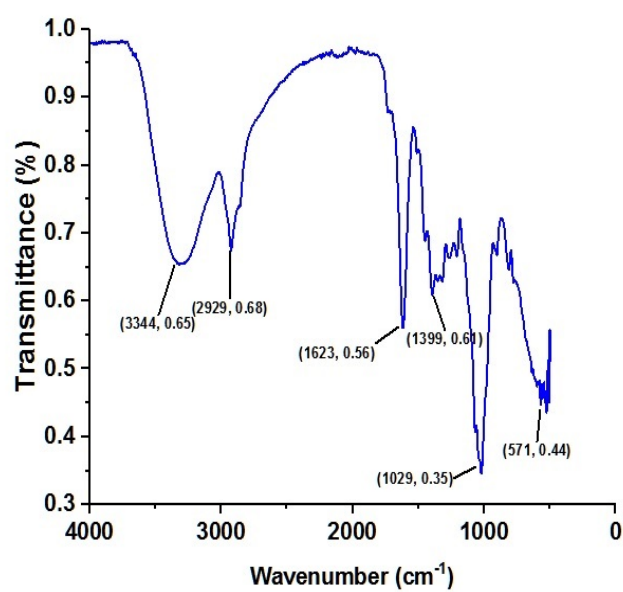

Figure S2. FTIR analysis of *M. buxifolia*.

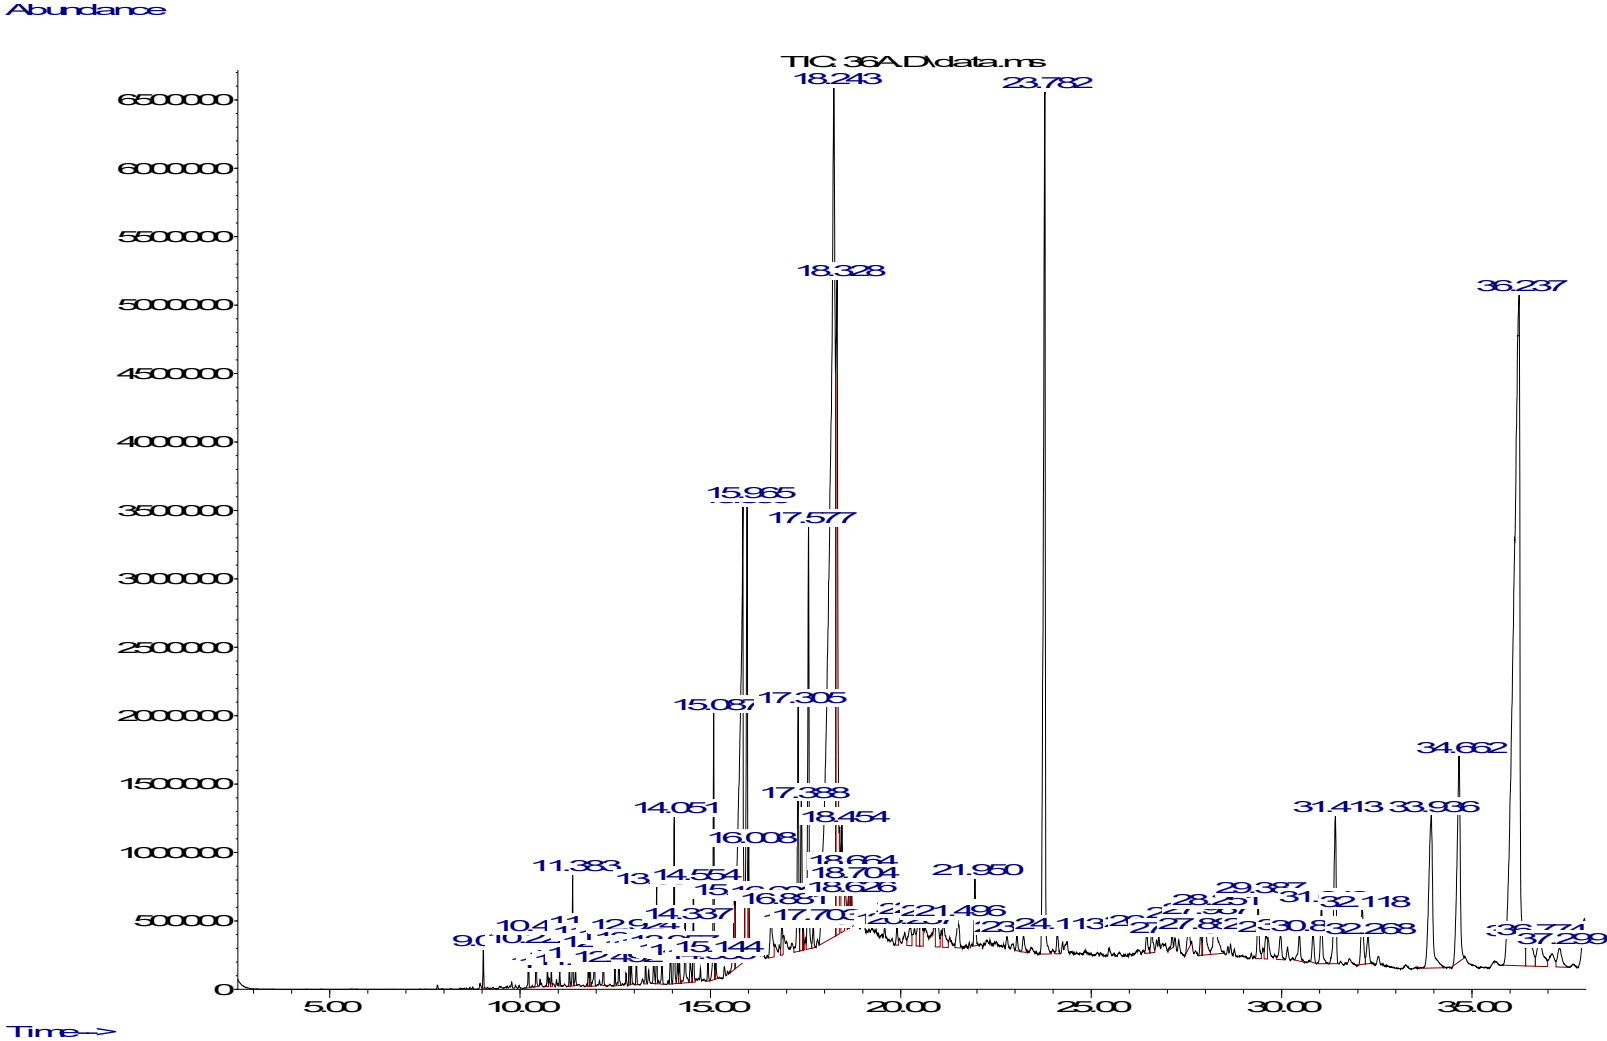

Figure S3. GCMS analysis of *M. buxifolia*.

Table S1. Summary of Casp-7 and Casp-9-fold expression by Real time PCR for methanolic *M. buxifolia* extract (n= 6).

| Treatments/ samples                 | Targeting <i>Casp-7</i>   |                 | Targeting <i>Casp-9</i>   |                 |
|-------------------------------------|---------------------------|-----------------|---------------------------|-----------------|
|                                     | Mean of $\Delta\Delta$ CT | Fold Expression | Mean of $\Delta\Delta$ CT | Fold Expression |
| NTC                                 | 0.00 $\pm$ 0.59           | 1.04 $\pm$ 0.41 | 0.00 $\pm$ 0.15           | 1.00 $\pm$ 0.01 |
| Doxorubicin 0.75 $\mu$ g            | -1.71 $\pm$ 0.08          | 3.26 $\pm$ 0.05 | -1.82 $\pm$ 0.20          | 3.52 $\pm$ 0.48 |
| <i>M. buxifolia</i> 100 $\mu$ g/ ml | -1.19 $\pm$ 0.04          | 2.28 $\pm$ 0.06 | -1.10 $\pm$ 0.08          | 2.14 $\pm$ 0.13 |
| <i>M. buxifolia</i> 300 $\mu$ g/ ml | -1.45 $\pm$ 0.04          | 2.72 $\pm$ 0.07 | -1.40 $\pm$ 0.01          | 2.64 $\pm$ 0.01 |

Table S2. Summary of Wnt- 3a and  $\beta$ - catenin gene fold expression by Real time PCR for methanolic *M. buxifolia* extract (n= 6).

| Treatments/ samples                 | Targeting <i>Wnt- 3a</i> gene |                  | Targeting $\beta$ - catenin gene |                 |
|-------------------------------------|-------------------------------|------------------|----------------------------------|-----------------|
|                                     | Mean of $\Delta\Delta$ CT     | Fold Expression  | Mean of $\Delta\Delta$ CT        | Fold Expression |
| NTC                                 | 0.00 $\pm$ 0.41               | 1.02 $\pm$ 0.28  | 0.00 $\pm$ 0.06                  | 1.00 $\pm$ 0.04 |
| Doxorubicin 0.75 $\mu$ g            | 2.77 $\pm$ 0.09               | 0.14 $\pm$ 0.007 | 1.09 $\pm$ 0.09                  | 0.47 $\pm$ 0.02 |
| <i>M. buxifolia</i> 100 $\mu$ g/ ml | 2.36 $\pm$ 0.11               | 0.20 $\pm$ 0.01  | 0.55 $\pm$ 0.04                  | 0.68 $\pm$ 0.01 |
| <i>M. buxifolia</i> 300 $\mu$ g/ ml | 2.25 $\pm$ 0.02               | 0.21 $\pm$ 0.001 | 0.66 $\pm$ 0.04                  | 0.63 $\pm$ 0.01 |

**Table S3.** List of primers used in the study.

| Sr. No | Primer Name       | Sequence               | Product size (bp) |
|--------|-------------------|------------------------|-------------------|
| 1      | Caspase-1_F       | TACCTCTTCCCAGGACATTA   | 110               |
| 2      | Caspase-1_R       | ATGGACTTTCAGTACCCTTTC  |                   |
| 3      | Caspase-3_F       | GCCTGTAACTTGAGAGTAGATG | 114               |
| 4      | Caspase-3_R       | GTATGGAGAAATGGGCTGTAG  |                   |
| 5      | Caspase-7_F       | TACCTTGGTCTCACCTATCC   | 143               |
| 6      | Caspase-7_R       | CCAGGCTTACATCCATTTCT   |                   |
| 7      | Caspase-9_F       | GAGACAGAGTTATGCCATGTTA | 136               |
| 8      | Caspase-9_R       | GGCCCTAAGAACCAGAAATAG  |                   |
| 9      | Wnt- 3a_F         | GGCACTAGGTAGGCTTCTA    | 142               |
| 10     | Wnt- 3a _R        | GAAGCCTCATCCACCATAAA   |                   |
| 11     | $\beta$ Catenin_F | GCTTTAGGACTTCACCTGAC   | 105               |
| 12     | $\beta$ Catenin_R | CTCCATCCCTTCCTGTTTAG   |                   |
| 13     | GAPDH_F           | GTATGACAACAGCCTCAAGAT  | 196               |
| 14     | GAPDH_R           | GTCCTTCCACGATACCAAAG   |                   |

**Table S4.** Optimized PCR conditions.

| Steps                | Sub-cycles       | Conditions    | PCR cycles |
|----------------------|------------------|---------------|------------|
| Initial Denaturation |                  | 95 °C, 12 min | 1          |
| PCR Cycles           | Denaturation     | 95 °C, 15 sec | 40         |
|                      | Primer annealing | 61°C, 20 sec  |            |
|                      | Primer extension | 72 °C, 20 sec |            |
| Hold                 |                  | 95 °C, 15 sec |            |
